# Supplementary material for: Increased Circulating Levels of Galectin Proteins in Patients with Breast, Colon, and Lung Cancer
Source: MDPI journal article supplement (doi:10.3390/cancers13194819), 2021-09-26
Supplement: s1 [file s1]

Supplemental Materials

Table S1. Breast cancer patient demographics

| Patient Characteristics (%) | Entire Population (n=40) | Stage I (n=10) | Stage II (n=10) | Stage III (n=10) | Stage IV (n=10) |
|-----------------------------|--------------------------|----------------|-----------------|------------------|-----------------|
| Race                        |                          |                |                 |                  |                 |
| White                       | 75                       | 100            | 70              | 50               | 80              |
| Black                       | 17.5                     | 0              | 20              | 50               | 0               |
| Latina                      | 2.5                      | 0              | 10              | 0                | 0               |
| Multiracial                 | 5                        | 0              | 0               | 0                | 20              |
| Ethnicity                   |                          |                |                 |                  |                 |
| Non-Spanish, Non-Hispanic   | 97.5                     | 100            | 90              | 100              | 100             |
| Spanish; Hispanic           | 2.5                      | 0              | 10              | 0                | 0               |
| Age                         |                          |                |                 |                  |                 |
| 30-39                       | 10                       | 0              | 20              | 0                | 20              |
| 40-49                       | 22.5                     | 0              | 20              | 30               | 40              |
| 50-59                       | 17.5                     | 10             | 20              | 30               | 10              |
| 60-69                       | 17.5                     | 20             | 10              | 10               | 30              |
| 70-79                       | 27.5                     | 50             | 30              | 30               | 0               |
| 80-89                       | 5                        | 20             | 0               | 0                | 0               |
| Smoking History             |                          |                |                 |                  |                 |
| Never                       | 60                       | 60             | 60              | 40               | 80              |
| Previous                    | 32.5                     | 30             | 40              | 40               | 20              |
| Current                     | 7.5                      | 10             | 0               | 20               | 0               |
| Tissue Site                 |                          |                |                 |                  |                 |
| Breast                      | 85                       | 90             | 100             | 90               | 60              |
| Lymph Node                  | 2.5                      | 10             | 0               | 0                | 0               |
| Brain                       | 7.5                      | 0              | 0               | 10               | 20              |
| Ovary                       | 2.5                      | 0              | 0               | 0                | 10              |
| Liver                       | 2.5                      | 0              | 0               | 0                | 10              |
| Prognosis                   |                          |                |                 |                  |                 |
| Primary                     | 82.5                     | 90             | 10              | 90               | 50              |

|                                   |      |    |    |    |    |
|-----------------------------------|------|----|----|----|----|
| Recurrence                        | 5    | 10 | 0  | 0  | 10 |
| Metastatic                        | 12.5 | 0  | 0  | 10 | 40 |
| <b>Histology</b>                  |      |    |    |    |    |
| Invasive                          | 2.5  | 0  | 0  | 0  | 0  |
| Invasive Ductal                   | 65   | 10 | 80 | 50 | 50 |
| Invasive Lobular                  | 2.5  | 80 | 0  | 10 | 0  |
| Invasive Mammary                  | 12.5 | 0  | 20 | 20 | 10 |
| Adenocarcinoma                    | 7.5  | 0  | 0  | 0  | 20 |
| Invasive Ductal<br>Adenocarcinoma | 2.5  | 10 | 0  | 10 | 0  |
| Carcinoma                         | 2.5  | 0  | 0  | 0  | 10 |
| Lobular Carcinoma                 | 2.5  | 0  | 0  | 0  | 10 |
| Other                             | 5    | 0  | 0  | 20 | 0  |

**Table S2.** Lung cancer patient demographics

| Patient Characteristics (%) |        | Entire Population (n=40) | Stage I<br>(n=10) | Stage II<br>(n=10) | Stage III<br>(n=10) | Stage IV<br>(n=10) |
|-----------------------------|--------|--------------------------|-------------------|--------------------|---------------------|--------------------|
| <b>Sex</b>                  |        |                          |                   |                    |                     |                    |
|                             | Male   | 57.5                     | 40                | 70                 | 70                  | 50                 |
|                             | Female | 42.5                     | 60                | 30                 | 30                  | 50                 |
| <b>Race</b>                 |        |                          |                   |                    |                     |                    |
|                             | White  | 75                       | 10                | 70                 | 80                  | 70                 |
|                             | Black  | 22.5                     | 10                | 30                 | 20                  | 30                 |
|                             | Latinx | 2.5                      | 80                | 0                  | 0                   | 0                  |
| <b>Age</b>                  |        |                          |                   |                    |                     |                    |
|                             | 40-49  | 5                        | 10                | 0                  | 10                  | 0                  |
|                             | 50-59  | 15                       | 30                | 10                 | 0                   | 20                 |
|                             | 60-69  | 57.5                     | 50                | 50                 | 70                  | 60                 |
|                             | 70-79  | 22.5                     | 10                | 40                 | 20                  | 20                 |
| <b>Smoking History</b>      |        |                          |                   |                    |                     |                    |
|                             | Never  | 7.5                      | 0                 | 0                  | 10                  | 20                 |

|                  |      |     |     |     |    |
|------------------|------|-----|-----|-----|----|
| Previous         | 55   | 70  | 70  | 70  | 10 |
| Current          | 37.5 | 30  | 30  | 20  | 70 |
| <b>Prognosis</b> |      |     |     |     |    |
| Primary          | 92.5 | 90  | 100 | 100 | 80 |
| Metastatic       | 7.5  | 10  | 0   | 0   | 20 |
| <b>Histology</b> |      |     |     |     |    |
| Adenocarcinoma   | 62.5 | 100 | 20  | 60  | 70 |
| Squamous Cell    | 32.5 | 0   | 80  | 40  | 10 |
| Large Cell       | 5    | 0   | 0   | 0   | 20 |

**Table S3.** Colon cancer patient demographics

| Patient Characteristics (%) |                         | Entire Population (n=37) | Stage I<br>(n=10) | Stage II<br>(n=10) | Stage III<br>(n=7) | Stage IV<br>(n=10) |
|-----------------------------|-------------------------|--------------------------|-------------------|--------------------|--------------------|--------------------|
| <b>Sex</b>                  |                         |                          |                   |                    |                    |                    |
|                             | Female                  | 48.7                     | 80                | 60                 | 71.4               | 50                 |
|                             | Male                    | 51.3                     | 20                | 40                 | 28.6               | 50                 |
| <b>Age</b>                  |                         |                          |                   |                    |                    |                    |
|                             | 20-29                   | 2.7                      | 10                | 0                  | 0                  | 10                 |
|                             | 40-49                   | 5.41                     | 30                | 0                  | 0                  | 10                 |
|                             | 50-59                   | 32.43                    | 10                | 50                 | 14.29              | 30                 |
|                             | 60-69                   | 18.92                    | 40                | 20                 | 57.14              | 0                  |
|                             | 70-79                   | 29.73                    | 10                | 30                 | 28.57              | 10                 |
|                             | 80-89                   | 10.81                    | 10                | 0                  | 0                  | 40                 |
| <b>Race</b>                 |                         |                          |                   |                    |                    |                    |
|                             | White                   | 81.1                     | 80                | 70                 | 85.7               | 90                 |
|                             | Black, African American | 18.9                     | 20                | 30                 | 14.3               | 10                 |
| <b>Smoking</b>              |                         |                          |                   |                    |                    |                    |
|                             | Not documented          | 8.1                      | 10                | 0                  | 28.5               | 0                  |
|                             | Never smoked            | 45.9                     | 40                | 50                 | 42.9               | 50                 |
|                             | Previous smoker         | 35.1                     | 40                | 40                 | 14.3               | 40                 |
|                             | Current smoker          | 10.8                     | 10                | 10                 | 14.3               | 10                 |
| <b>Prognosis</b>            |                         |                          |                   |                    |                    |                    |
|                             | Primary                 | 64.9                     | 100               | 40                 | 85.7               | 40                 |
|                             | Recurrence              | 5.4                      | 0                 | 0                  | 0                  | 20                 |
|                             | Metastatic              | 29.7                     | 0                 | 60                 | 14.3               | 40                 |
| <b>Sample Type</b>          |                         |                          |                   |                    |                    |                    |
|                             | EDTA Plasma             | 54.1                     | 50                | 50                 | 71.4               | 50                 |
|                             | Serum                   | 45.9                     | 50                | 50                 | 28.6               | 50                 |

**Table S4.** Galectin concentration values for patient groups in Figure 1

| Galectin | Group   | N  | Mean (ng/mL) | Std Dev | Range (ng/mL) | 5% Quantile | 95% Quantile | p-value |
|----------|---------|----|--------------|---------|---------------|-------------|--------------|---------|
| Gal-1    | Healthy | 36 | 18.1         | 3.40    |               |             |              |         |
|          | Breast  | 40 | 23.40        | 7.14    | 11.30 - 43.92 | 13.64       | 37.15        | 0.0007  |
|          | Colon   | 37 | 34.33        | 16.85   | 5.38 - 88.38  | 15.73       | 73.07        | ≤0.0001 |
|          | Lung    | 40 | 26.83        | 12.81   | 13.41 - 83.69 | 15.28       | 47.67        | 0.0002  |
| Gal-3    | Healthy | 36 | 6.73         | 2.00    |               |             |              |         |
|          | Breast  | 40 | 17.05        | 6.65    | 8.85 - 38.20  | 9.05        | 31.68        | ≤0.0001 |
|          | Colon   | 37 | 13.56        | 6.67    | 3.21 - 30.12  | 4.88        | 29.91        | ≤0.0001 |
|          | Lung    | 39 | 17.84        | 6.90    | 4.52 - 37.82  | 6.55        | 29.79        | ≤0.0001 |
| Gal-7    | Healthy | 27 | 2.12         | 5.15    | 0.15 - 27.26  | 0.16        | 18.66        |         |
|          | Breast  | 40 | 1.70         | 1.75    | 0.46 - 11.69  | 0.54        | 3.34         | .0497   |
|          | Colon   | 36 | 0.93         | 0.70    | 0.22 - 3.77   | 0.23        | 2.11         |         |
|          | Lung    | 40 | 1.90         | 1.11    | 0.42 - 5.08   | 0.43        | 4.60         | 0.0071  |
| Gal-8    | Healthy | 15 | 2.00         | 1.73    | 0.46 - 5.97   | 0.46        | 5.97         |         |
|          | Breast  | 34 | 2.42         | 2.21    | 0.95 - 11.84  | 0.95        | 7.63         |         |
|          | Colon   | 28 | 2.48         | 3.16    | 0.58 - 13.19  | 0.60        | 12.30        |         |
|          | Lung    | 32 | 2.67         | 7.89    | 0.56 - 45.71  | 0.57        | 18.82        |         |
| Gal-9    | Healthy | 36 | 7            | 1.63    |               |             |              |         |
|          | Breast  | 40 | 8.44         | 3.06    | 3.42 - 16.12  | 4.26        | 14.60        |         |
|          | Colon   | 37 | 9.92         | 3.89    | 5.27 - 25.12  | 5.42        | 18.47        | 0.0005  |
|          | Lung    | 40 | 10.12        | 4.81    | 3.79 - 26.64  | 4.92        | 25.73        | 0.0002  |

**Table S5.** Galectin concentration values for patient groups in Figure 2

| Gal   | Cancer | Stage | Mean (ng/mL) | Std Dev | Range (ng/mL) | 5% Quantile | 95% Quantile | p-value |
|-------|--------|-------|--------------|---------|---------------|-------------|--------------|---------|
| Gal-1 | Breast | I     | 25.83        | 8.86    | 15.03 - 37.22 | 15.03       | 37.22        | 0.0456  |
|       |        | II    | 20.47        | 5.22    | 11.30 - 28.36 | 11.30       | 28.36        |         |
|       |        | III   | 25.33        | 7.84    | 13.56 - 43.92 | 13.56       | 43.92        | 0.0025  |
|       |        | IV    | 21.95        | 5.57    | 15.04 - 32.13 | 15.04       | 32.13        |         |
|       | Colon  | I     | 33.14        | 12.89   | 20.43 - 63.99 | 20.43       | 63.99        | ≤0.0001 |
|       |        | II    | 35.80        | 22.33   | 5.38 - 88.38  | 5.38        | 88.38        | 0.0022  |
|       |        | III   | 33.21        | 18.56   | 21.06 - 71.37 | 21.06       | 71.37        | 0.0026  |
|       |        | IV    | 34.82        | 15.37   | 16.89 - 61.31 | 16.89       | 61.31        | 0.0014  |
|       | Lung   | I     | 27.06        | 8.22    | 16.80 - 42.35 | 16.80       | 42.35        | 0.0036  |
|       |        | II    | 32.28        | 21.31   | 16.39 - 83.69 | 16.39       | 83.69        | 0.0364  |
|       |        | III   | 25.05        | 7.62    | 15.37 - 40.34 | 15.37       | 40.34        | 0.0179  |
|       |        | IV    | 22.91        | 8.79    | 13.41 - 39.01 | 13.41       | 39.01        |         |
| Gal-3 | Breast | I     | 18.01        | 7.37    | 9.02 - 31.70  | 9.02        | 31.70        | ≤0.0001 |
|       |        | II    | 17.77        | 4.44    | 11.50 - 23.98 | 11.50       | 23.98        | ≤0.0001 |

|       |        |     |       |       |               |       |       |         |
|-------|--------|-----|-------|-------|---------------|-------|-------|---------|
| Gal-7 | Colon  | III | 16.86 | 8.74  | 8.85 - 38.20  | 8.85  | 38.20 | ≤0.0001 |
|       |        | IV  | 15.58 | 6.08  | 9.69 - 31.35  | 9.69  | 31.35 | ≤0.0001 |
|       |        | I   | 14.64 | 6.92  | 8.09 - 29.89  | 8.09  | 29.89 | ≤0.0001 |
|       |        | II  | 14.41 | 8.08  | 7.14 - 30.12  | 7.14  | 30.12 | 0.0002  |
|       |        | III | 13.53 | 6.87  | 3.21 - 24.74  | 3.21  | 24.74 | 0.0235  |
|       |        | IV  | 11.65 | 5.23  | 5.07 - 20.51  | 5.07  | 20.51 | 0.0152  |
|       |        | I   | 19.19 | 6.46  | 11.14 - 29.79 | 11.14 | 29.79 | ≤0.0001 |
|       |        | II  | 17.78 | 9.03  | 4.52 - 37.82  | 4.52  | 37.82 | 0.0005  |
|       | Lung   | III | 16.23 | 4.93  | 9.09 - 24.68  | 9.09  | 24.68 | ≤0.0001 |
|       |        | IV  | 18.18 | 7.35  | 6.55 - 28.08  | 6.55  | 28.08 | 0.0004  |
|       |        | I   | 2.10  | 0.80  | 1.00 - 3.37   | 1.00  | 3.37  | 0.0206  |
|       |        | II  | 2.40  | 3.28  | 1.00 - 11.69  | 1.00  | 11.69 |         |
|       |        | III | 1.11  | 0.39  | 0.58 - 1.95   | 0.58  | 1.95  |         |
|       |        | IV  | 1.18  | 0.49  | 0.46 - 1.69   | 0.46  | 1.69  |         |
|       |        | I   | 0.82  | 0.57  | 0.22 - 1.68   | 0.22  | 1.68  | 0.0341  |
|       |        | II  | 0.68  | 0.35  | 0.23 - 1.24   | 0.23  | 1.24  |         |
|       |        | III | 1.38  | 1.23  | 0.23 - 3.77   | 0.23  | 3.77  |         |
|       |        | IV  | 0.96  | 0.48  | 0.41 - 1.73   | 0.41  | 1.73  |         |
|       | Lung   | I   | 1.15  | 0.67  | 0.42 - 2.58   | 0.42  | 2.58  | 0.0341  |
|       |        | II  | 2.36  | 1.43  | 0.95 - 5.07   | 0.95  | 5.07  |         |
|       |        | III | 2.09  | 1.18  | 0.99 - 4.35   | 0.99  | 4.35  |         |
|       |        | IV  | 1.99  | 0.76  | 1.05 - 3.20   | 1.05  | 3.20  |         |
| Gal-8 | Breast | I   | 2.41  | 1.82  | 0.95 - 6.22   | 0.95  | 6.22  |         |
|       |        | II  | 2.62  | 1.87  | 0.96 - 6.05   | 0.96  | 6.05  |         |
|       |        | III | 3.02  | 3.49  | 0.95 - 11.84  | 0.95  | 11.84 |         |
|       |        | IV  | 1.64  | 0.89  | 1.02 - 3.77   | 1.02  | 3.77  |         |
|       | Colon  | I   | 3.12  | 3.78  | 0.67 - 11.21  | 0.67  | 11.21 |         |
|       |        | II  | 1.98  | 1.63  | 0.62 - 4.51   | 0.62  | 4.51  |         |
|       |        | III | 3.14  | 4.99  | 0.58 - 13.19  | 0.58  | 13.19 |         |
|       |        | IV  | 1.65  | 1.72  | 0.74 - 5.13   | 0.74  | 5.13  |         |
|       | Lung   | I   | 1.61  | 1.22  | 0.57 - 4.35   | 0.57  | 4.35  |         |
|       |        | II  | 0.99  | 0.45  | 0.58 - 1.79   | 0.58  | 1.79  |         |
|       |        | III | 1.15  | 0.50  | 0.56 - 1.80   | 0.56  | 1.80  |         |
|       |        | IV  | 6.85  | 15.71 | 0.70 - 45.71  | 0.70  | 45.71 |         |
| Gal-9 | Breast | I   | 9.31  | 2.62  | 5.76 - 12.54  | 5.76  | 12.54 |         |
|       |        | II  | 7.59  | 3.35  | 4.26 - 12.78  | 4.26  | 12.78 |         |
|       |        | III | 8.39  | 3.21  | 3.42 - 16.12  | 3.42  | 16.12 |         |
|       |        | IV  | 8.48  | 3.24  | 4.78 - 14.69  | 4.78  | 14.69 |         |
|       | Colon  | I   | 9.04  | 2.53  | 5.79 - 12.00  | 5.79  | 12.00 |         |
|       |        | II  | 9.46  | 3.24  | 5.27 - 15.85  | 5.27  | 15.85 |         |

|      |     |       |      |              |      |       |        |
|------|-----|-------|------|--------------|------|-------|--------|
|      | III | 10.57 | 6.47 | 6.97 - 25.12 | 6.97 | 25.12 |        |
|      | IV  | 10.81 | 3.65 | 5.44 - 17.73 | 5.44 | 17.73 | 0.0044 |
| Lung | I   | 11.27 | 4.16 | 4.92 - 20.52 | 4.92 | 20.52 | 0.0030 |
|      | II  | 10.22 | 6.02 | 5.29 - 26.00 | 5.29 | 26.00 |        |
|      | III | 8.30  | 2.59 | 3.79 - 12.65 | 3.79 | 12.65 |        |
|      | IV  | 10.69 | 5.86 | 6.61 - 26.64 | 6.61 | 26.64 | 0.0179 |
